# Supplementary material for: Toward sustainable diagnostics for Candida albicans: the role of artificial intelligence in analytical chemistry from data processing to Python-based blueness and redness evaluation metrics
Source: Royal Society of Chemistry journal article supplement (doi:10.1039/d6ra00286b), 2026-04-08
Supplement: d6ra00286b1.pdf [file d6ra00286b1.pdf]

### Supplementary Materials

**Table S1.** Analytical methods for detection of *Candida albicans*.

| <b>UN SDG</b> | <b>Title</b>                            | <b>Scientific Relevance of Rapid <i>Candida albicans</i> Detection</b>                                                                                                                                                |
|---------------|-----------------------------------------|-----------------------------------------------------------------------------------------------------------------------------------------------------------------------------------------------------------------------|
| <b>SDG 3</b>  | Good Health and Well-Being              | Rapid molecular diagnostics of <i>C. albicans</i> enable timely clinical interventions, reduce morbidity and mortality in immunocompromised patients, and contribute to improved public health outcomes.              |
| <b>SDG 9</b>  | Industry, Innovation and Infrastructure | Implementation of advanced diagnostic platforms (e.g., real-time PCR, FRET-based melting curve analysis) fosters biomedical innovation and strengthens healthcare diagnostic infrastructure.                          |
| <b>SDG 12</b> | Responsible Consumption and Production  | Early pathogen detection supports rational antifungal stewardship, minimizing unnecessary drug use, reducing selective pressure for resistance, and promoting sustainable clinical practices.                         |
| <b>SDG 17</b> | Partnerships for the Goals              | Development and validation of rapid diagnostic assays rely on multidisciplinary and international collaborations between academia, clinical laboratories, and industry, thereby enhancing global health partnerships. |

**Table S2.** Comparative analysis of Python versus alternative computational platforms in analytical chemistry.

| <b>Feature</b>            | <b>Python</b>                  | <b>MATLAB</b>                 | <b>Julia</b>          | <b>R</b>                  | <b>C++/Fortran</b>     |
|---------------------------|--------------------------------|-------------------------------|-----------------------|---------------------------|------------------------|
| <b>Ease of Learning</b>   | High                           | Good                          | Moderate              | Moderate                  | Low                    |
| <b>Library Ecosystem</b>  | Vast<br>(General + Scientific) | Specialized<br>(Toolboxes)    | Strong                | Excellent<br>(Statistics) | Minimal<br>(Low-level) |
| <b>Execution Speed</b>    | High<br>(JIT/accel)            | Moderate                      | High                  | Moderate                  | Ultra-High             |
| <b>Parallel Computing</b> | Improved<br>(multiprocessing)  | Excellent                     | Native &<br>excellent | Good                      | Native                 |
| <b>Use in Chemistry</b>   | Automation, data<br>analysis   | Signal/spectral<br>processing | High-speed            | Chemometrics              | Core engines           |
| <b>Cost</b>               | Open-source<br>(Free)          | Commercial<br>(Expensive)     | Open-source<br>(Free) | Open-source<br>(Free)     | Open-source<br>(Free)  |

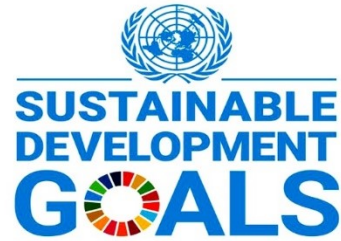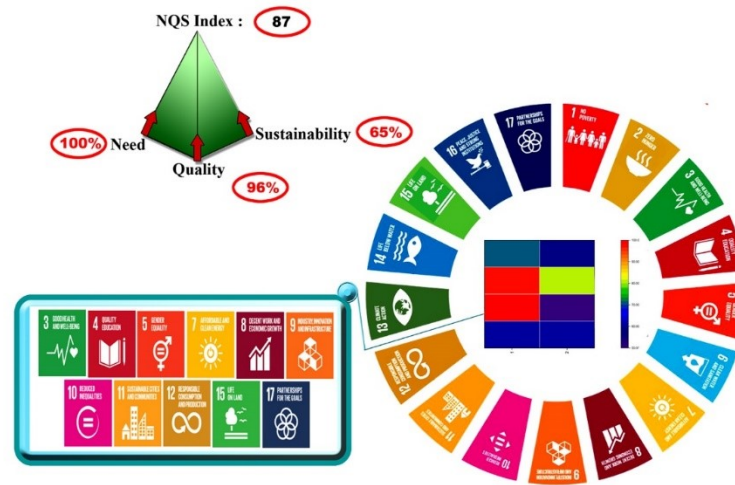

**Fig S1:** Statistical Workflow for Sustainability Evaluation Using the Need–Quality–Sustainability (NQS) Index within Koel’s Pyramid Framework and the UN Sustainable Development Goals (SDGs).

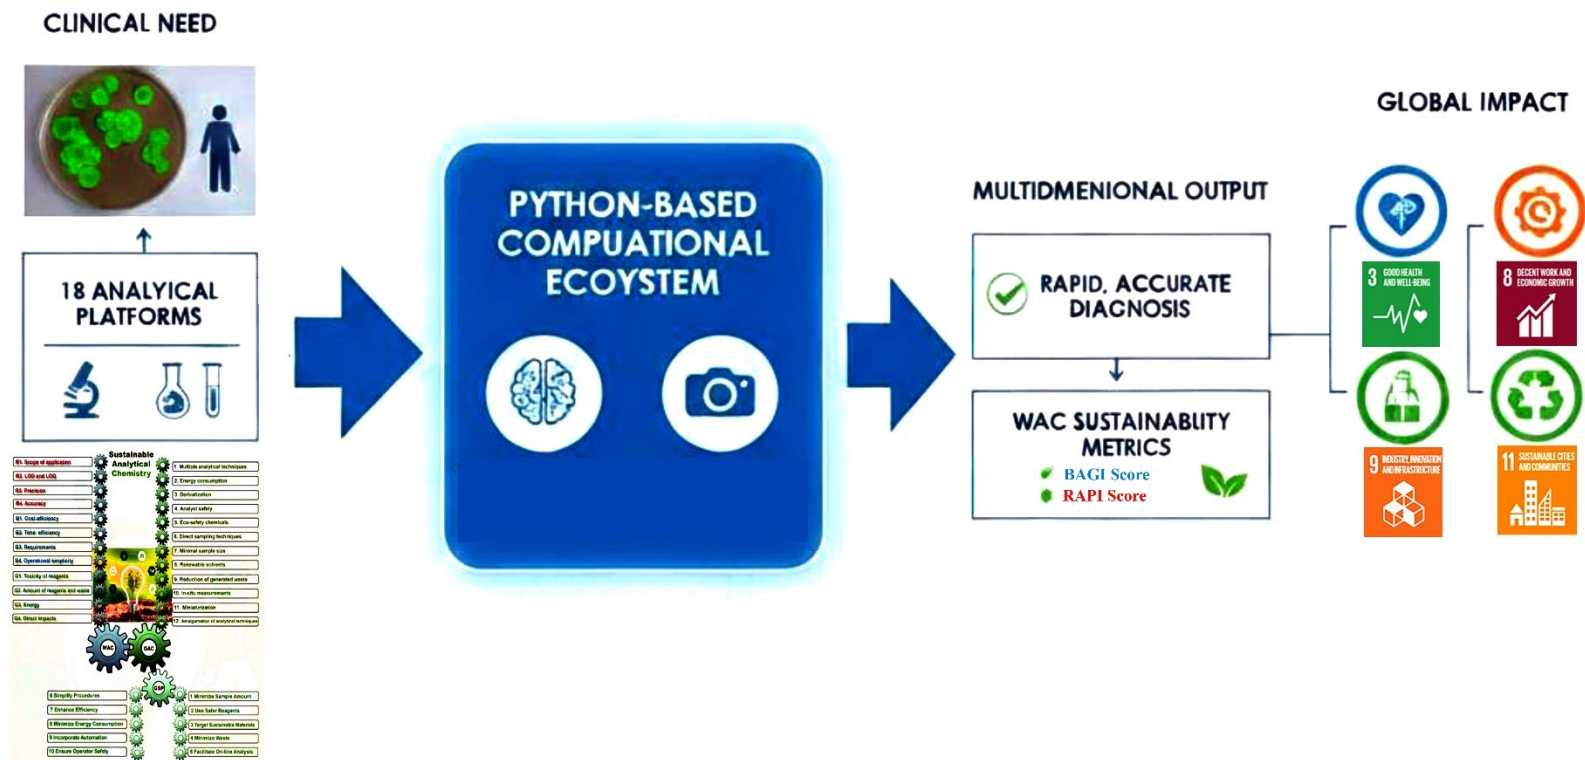

Fig S2: The Python-AI Diagnostic Roadmap for *C. albicans*: From Clinical Need to SDG Impact.
